# Supplementary material for: Diagnostic accuracy of Truenat MTB Plus, Truenat MTB Ultima and Xpert MTB/RIF Ultra for the diagnosis of pulmonary TB in an HIV-endemic setting
Source: Research Square preprint supplement (doi:10.21203/rs.3.rs-5055991/v1), 2024-09-10
Supplement: Supplementary file 1 [file 7571d9dac3a766ec33f0f430.docx]

Methods 2

Definitions 2

Presumptive TB 2

TBscoreII 2

Head-to-head analysis 2

Extended microbiological reference standard (eMRS) 2

Diagnostic yield among those tested (DYT) 2

Diagnostic yield among those diagnosed (DYD) 2

Results 3

Supplementary figure 1. Sensitivity of MTB Plus, Ultima and Ultra for TB detection versus the MRS and eMRS, stratified by HIV and smear statuses 3

Supplementary figure 2. Specificity of MTB Plus and Ultima compared to Ultra for TB detection in comparison with MRS and eMRS stratified by HIV status 4

Supplementary figure 3. Number of unsuccessful results by testing week for (A) MTB Plus and (B) Ultima. 5

Supplementary table 1. MTB Plus and Ultima successful and unsuccessful results for TB detection, before and after repeat testing of the same eluate. 6

Supplementary table 2. Proportion unsuccessful (invalid, error) and false-positive results for MTB Plus and Ultima based on lot (initial and repeat testing result).. 7

Supplementary table 3. Diagnostic accuracy of MTB Plus and Ultima compared to the eMRS for TB detection of TB stratified by HIV status 8

Supplementary table 4. Diagnostic accuracy and diagnostic yield of MTB Plus and Ultima compared to MRS for TB detection, stratified by HIV status. 9

Supplementary table 5. Proportion of successful and unsuccessful MTB-RIF Dx results, stratified by MTB Plus- or Ultima-positivity, and compared to Ultra for rifampicin resistance detection. 10

Supplementary table 6. Proportion of MTB-RIF Dx unsuccessful results stratified by MTB Plus and Ultima Semi-quantitation levels. 11

Supplementary table 7. Diagnostic accuracy of MTB-RIF Dx compared to Ultra for the detection of rifampicin resistance in sputum samples. 12

Supplementary table 8. Specificity and positive predictive values of MTB Plus and Ultima compared to MRS and eMRS for TB detection stratified by previous TB status. 13

# Methods

## Definitions

### Presumptive TB

A participant with symptoms or signs of TB per standard criteria (1) of cough ≥2 weeks (or any duration if PLHIV), drenching night sweats, weight loss within eight weeks, and fever. HIV-negative participants require at least two symptoms, and PLHIV at least one.

### TBscoreII

TBscoreII was calculated using cough, dyspnea, chest pain, anemia, BMI and MUAC (2).

### Head-to-head analysis

These are the comparisons done on all participants who had all three tests (MTB Plus, Ultima, Ultra) attempted.

### Extended microbiological reference standard (eMRS)

A definite TB case was defined per the MRS or, if MRS-negative or unsuccessful, sputum Ultra-positive. A non-TB was defined as negative for MGIT960 culture and Ultra. People missing successful eMRS or Ultra results were excluded.

### Diagnostic yield among those tested (DYT)

The proportion of people in whom a diagnostic test identifies TB among all people for whom testing is attempted.

### Diagnostic yield among those diagnosed (DYD)

The proportion of people in whom a diagnostic test identifies TB among TB positive people for whom testing is attempted.

# Results

## **Supplementary figure 1. Sensitivity of MTB Plus, Ultima and Ultra for TB detection versus the MRS and eMRS, stratified by HIV and smear statuses excluding repeat test results for Truenat.** Sensitivities were similar when stratified by HIV status and lower in smear-negative sputa.

**
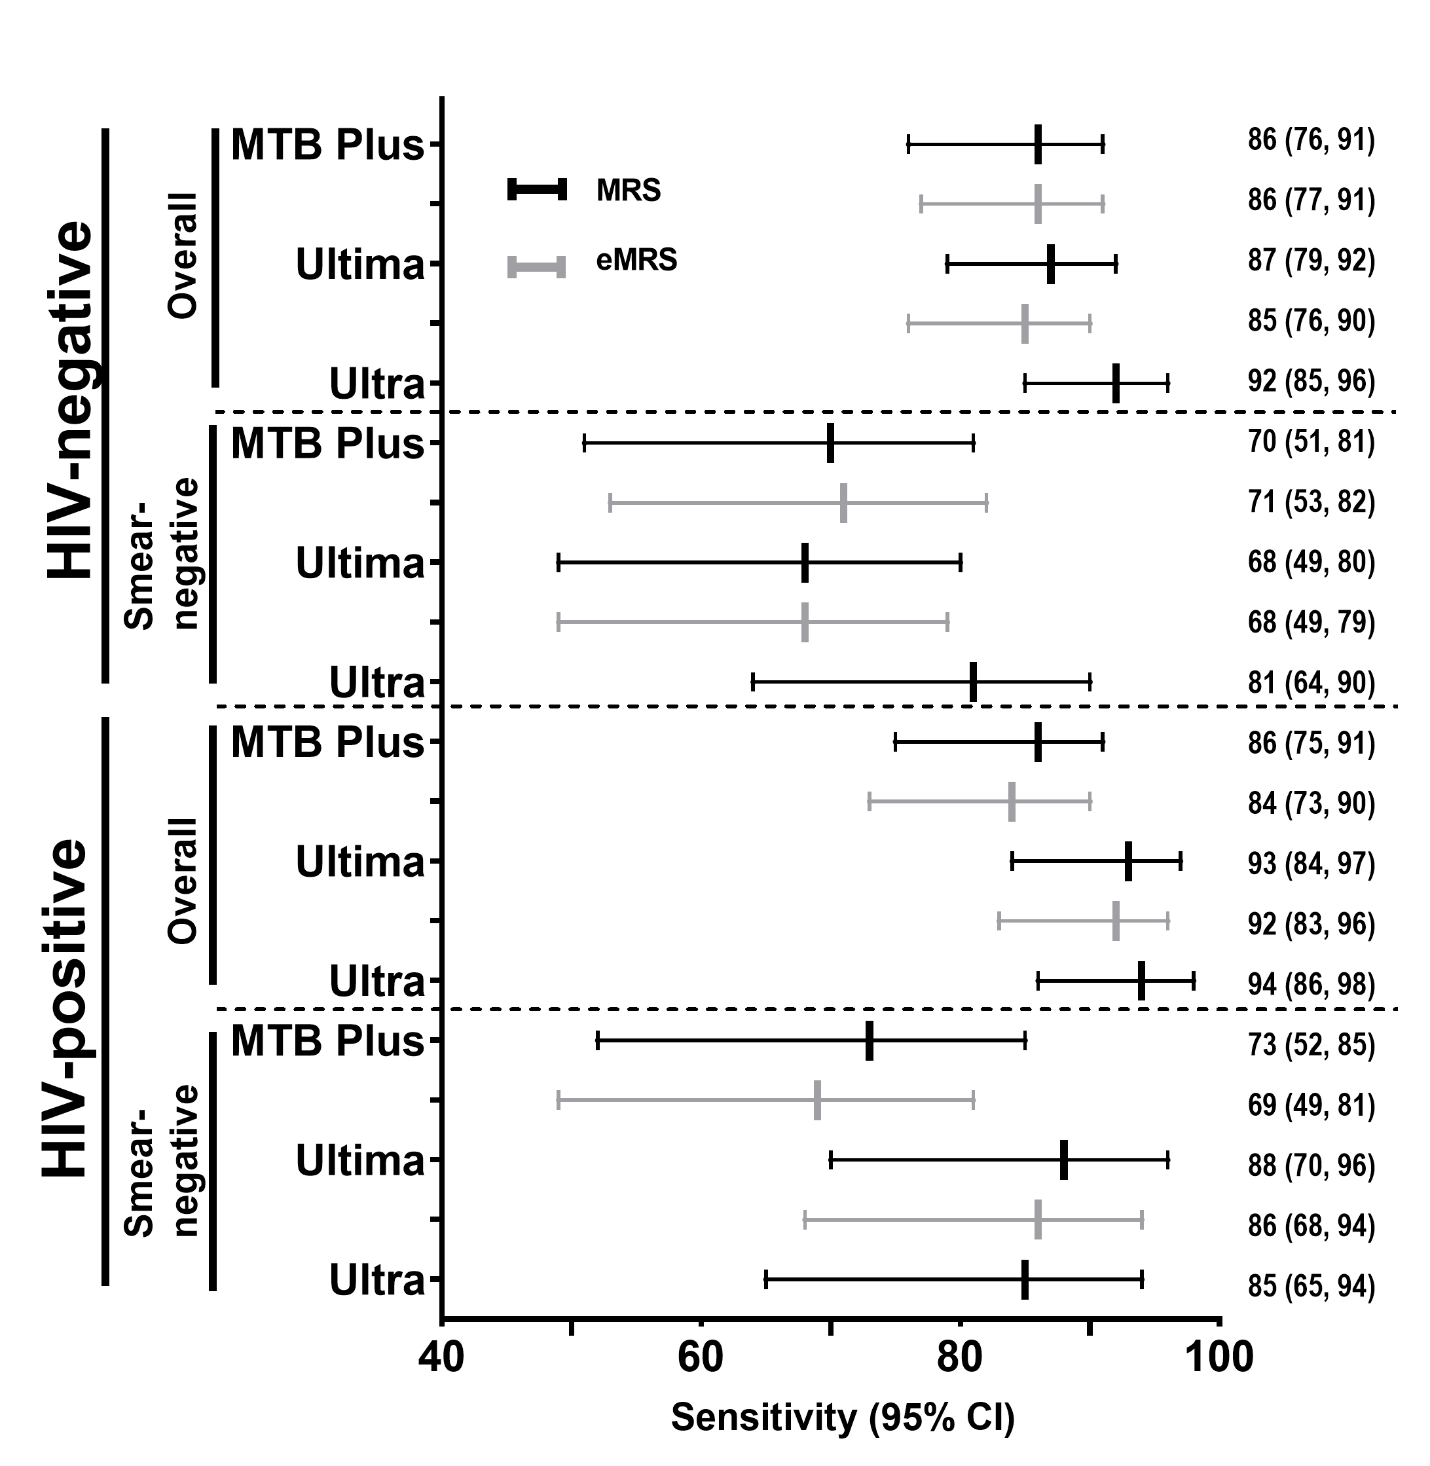
**

**Supplementary figure 2. Specificity of MTB Plus and Ultima compared to Ultra for TB detection in comparison with MRS and eMRS stratified by HIV status, excluding repeat test results for Truenat.** Among PLHIV, Ultima specificity was lower than MTB Plus and Ultra.


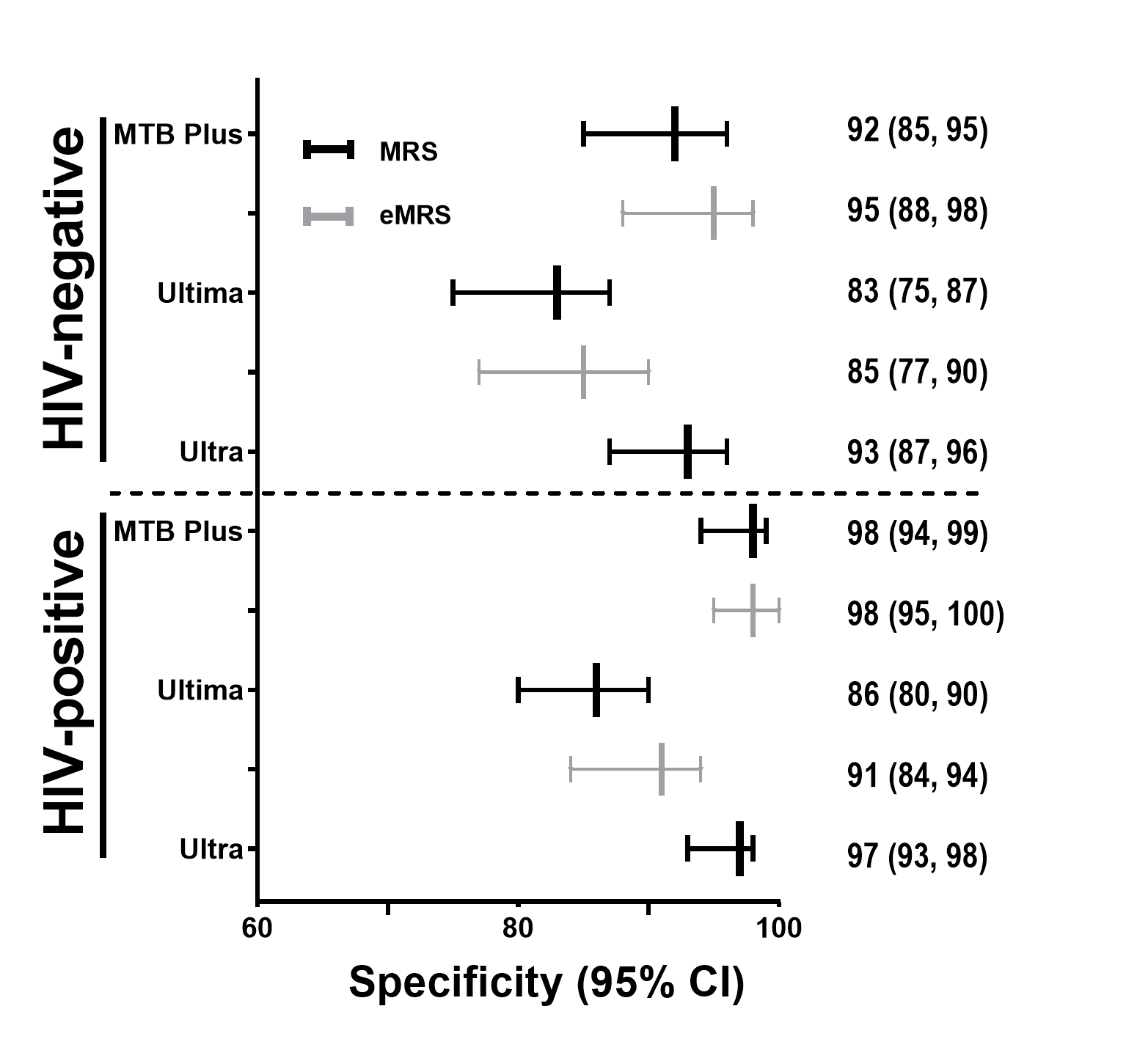


## **Supplementary figure 3. Number of unsuccessful results by testing week for (A) MTB Plus and (B) Ultima.** The proportion of unsuccessful results in both assays was generally consistent over time and not clustered at the start of testing.


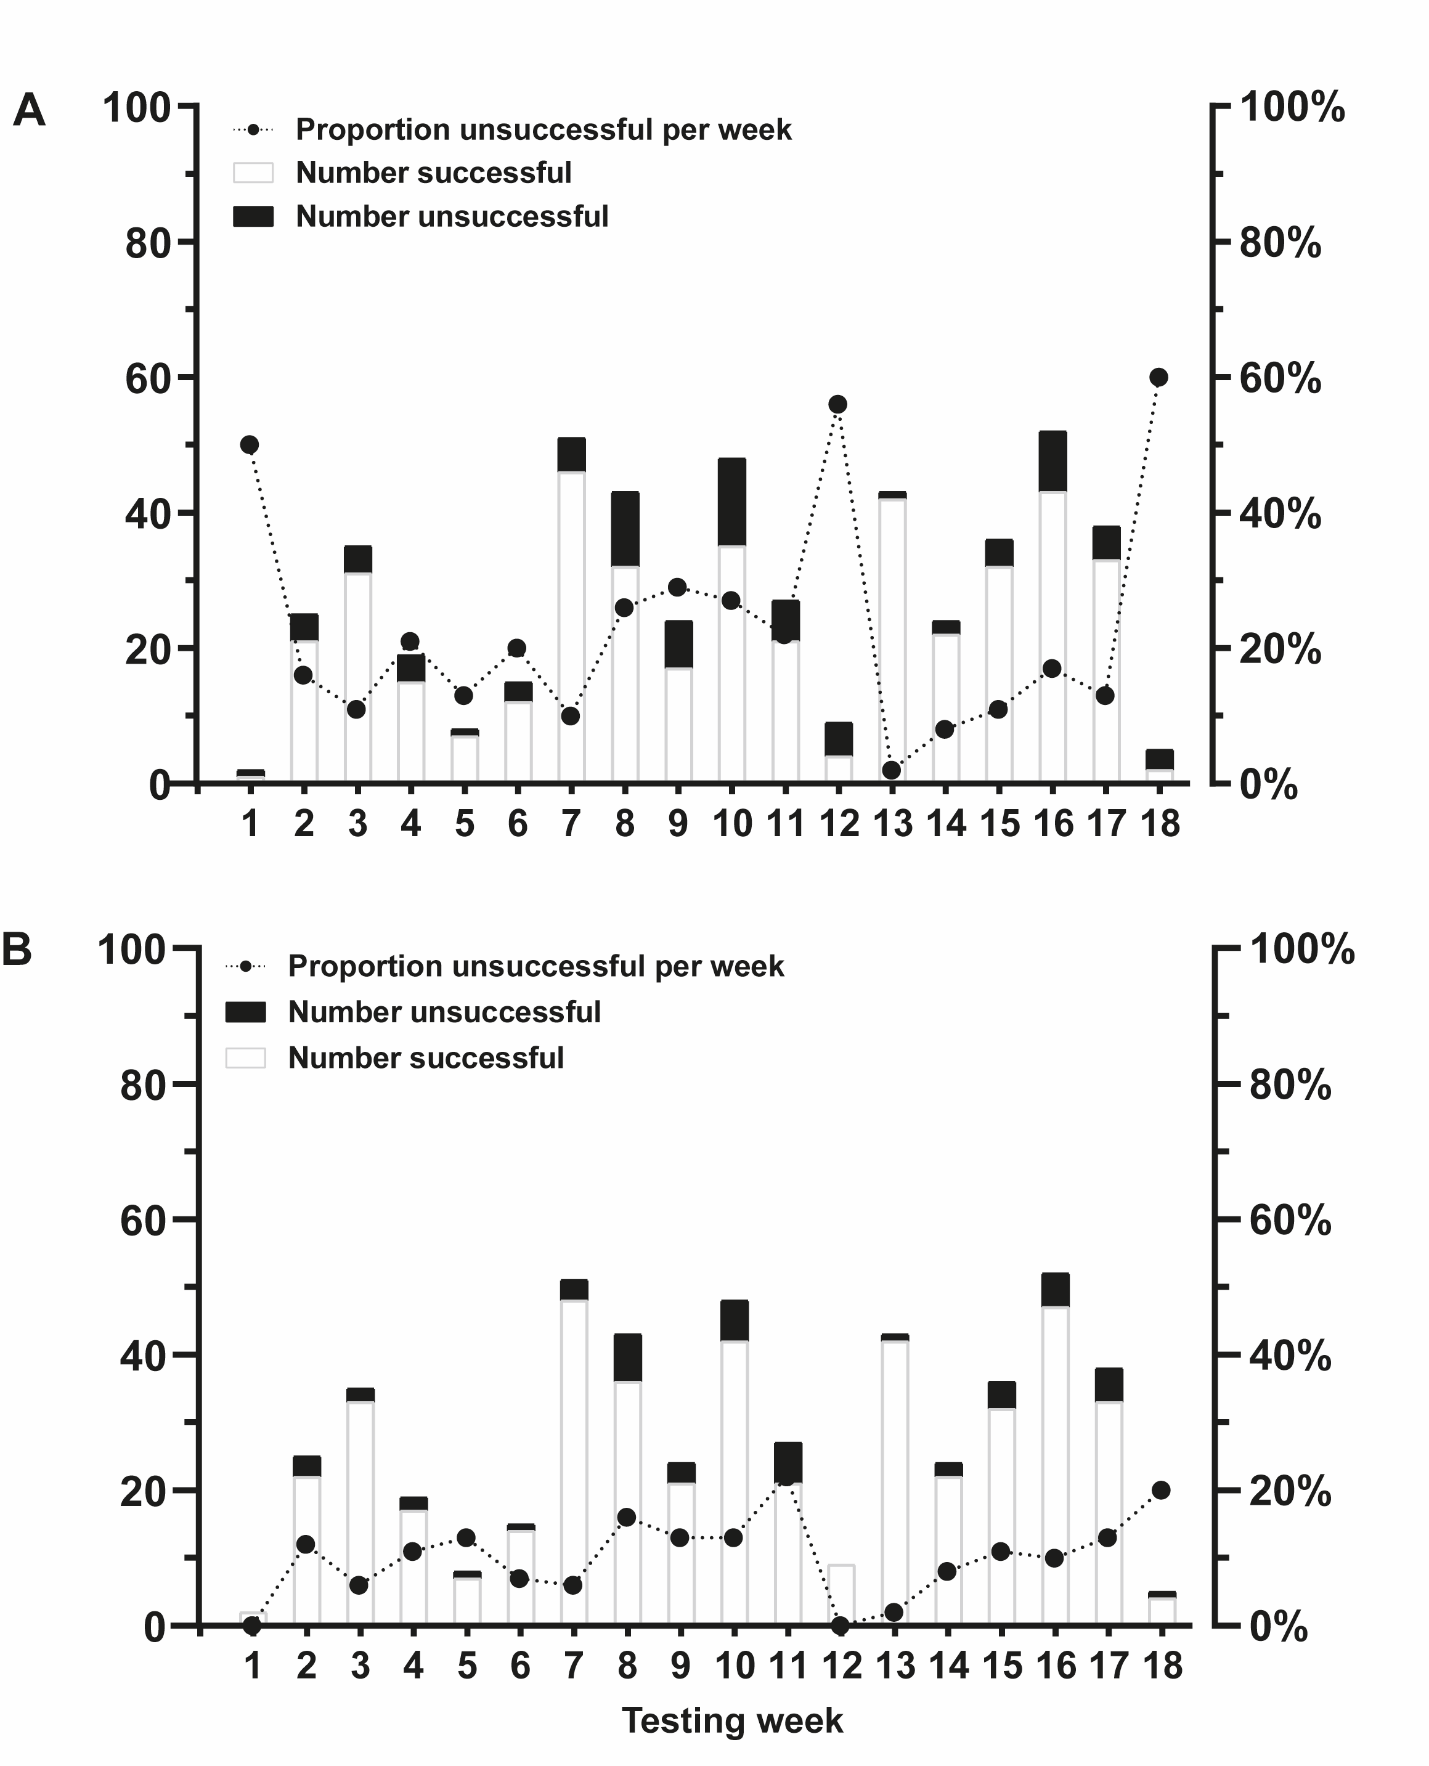


**Supplementary table 1. MTB Plus and Ultima successful and unsuccessful results for TB detection, before and after repeat testing of the same eluate.** Unsuccessful results were more common for MTB Plus than Ultima. Repeat testing resolved over half of the unsuccessful results for both tests. Data are % (95% CI) n/N.

|  | **MTB Plus** | | | **Ultima** | | |
| --- | --- | --- | --- | --- | --- | --- |
|  | **Initial test results** | **Repeated results**  **of initial unsuccessful test# (n=86)** | **Final results*** | **Initial test results** | **Repeated results**  **of initial unsuccessful test#**  **(n=52)** | **Final results*** |
| Successful  (detected or not detected) | 83   (79, 85)  415/501 | 60   (49, 68)  52/86 | 93  (91, 95)  467/501 | 90   (87, 92)  449/501 | 54   (39, 64)  28/52 | 95  (93, 97)  477/501 |
| Unsuccessful | 17   (14, 20)  86/501 | 40   (29, 48)  34/86 | 7  (5, 9)  34/501 | 10   (8, 13)  52/501 | 46   (32, 57)  24/52 | 5  (3, 6)  24/501 |
|  |  |  |  | **p=0.0018**† |  |  |
| Invalid | 90   (81, 94)  77/86 | 100   (90, 100)  34/34 | 100  (90, 100)  34/34 | 94   (84, 98)  49/52 | 100   (86, 100)  24/24 | 100   (86, 100)  24/24 |
| Error | 10   (5, 17)  9/86 | 0   (0, 7)  0/34 | 0   (0, 7)  0/34 | 6   (1, 13)  3/52 | 0   (0, 10)  0/24 | 0  (0, 10)  0/24 |
| Error-1 | 78   (40, 95)  7/9 |  |  | 33   (1, 83)  1/3 |  |  |
| Error-4 | 11   (0, 39)  1/9 |  |  | 67   (9, 97)  2/3 |  |  |
| Error-5 | 11   (0, 39)  1/9 |  |  | 0   (0, 58)  0/3 |  |  |
| **Total** | **501** | **86** | **501** | **501** | **52** | **501** |

*Combined initial results and, if unsuccessful, with any repeats.

Within row p-values: †proportion unsuccessful initial test for MTB Plus vs. Ultima.

Error code definitions: Error-1 (faulty test chip); Error-4 (Runtime Error); Error-5 (Probe check error). Bold font represents p values <0.05

**Supplementary table 2. Proportion unsuccessful (invalid, error) and false-positive results for MTB Plus and Ultima based on lot (initial and repeat testing result).** For MTB Plus, the proportion of false-positive results was higher for lot # TP037. For Ultima the proportion of invalid was higher for lot # EMT02 than EMT03, the proportion of false-positive results was similar.

|  | **Total unsuccessful** | **Invalid** | **Error** | **False-positive** |
| --- | --- | --- | --- | --- |
| **MTB Plus** |  |  |  |  |
| Lot TP036 | 17   (12, 22)  31/179 | 15   (10, 19)  26/179 | 3   (1, 5)  5/179 | 0  (0, 1)  0/179 |
| Lot TP037 | 22   (18, 25)  89/408 | 21   (17, 24)  85/408 | 1   (0, 2)  4/408 | 3  (2, 4)  12/408 |
|  | p=0.2137 | p=0.0724 | p=0.0998 | **p=0.0204** |
| **Ultima** |  |  |  |  |
| Lot EMT02 | 17   (13, 21)  48/282 | 17   (13, 20)  47/282 | 0   (0, 1)  1/282 | 7  (4, 10)  20/282 |
| Lot EMT03 | 10   (7, 13)  28/271 | 10   (6, 13)  26/271 | 1   (0, 2)  2/271 | 10  (6, 13)  26/271 |
|  | **p=0.0224** | **p=0.0140** | p=0.5395 | p=0.2869 |

Within column p-values compare across lots for a specific test. Bold font represents p values <0.05.

**Supplementary table 3. Diagnostic accuracy of MTB Plus and Ultima compared to the eMRS for TB detection of TB stratified by HIV status excluding repeat test results for MTB Plus and Ultima.** There was no difference in performance of MTB Plus and Ultima when comparing MRS (**Table 2**) to eMRS. Data are % (95% CI) n/N

|  | **All patients** | | | | **HIV-negative**  229/498 (46) | | | | **HIV-positive**  269/498 (54) | | | |
| --- | --- | --- | --- | --- | --- | --- | --- | --- | --- | --- | --- | --- |
| **Sensitivity** | **Specificity** | **PPV** | **NPV** | **Sensitivity** | **Specificity** | **PPV** | **NPV** | **Sensitivity** | **Specificity** | **PPV** | **NPV** |
| **MTB Plus all** | 85  (78, 89)  135/159 | 97  (94, 98)  218/225 | 95  (90, 97)  135/142 | 90  (86, 93)  218/242 | 86  (77, 91)  74/86 | 95  (88, 98)  90/95 | 94  (86, 97)  74/79 | 88  (80, 93)  12/102 | 84  (73, 90)  61/73 | 98  (95, 100)  128/130 | 97  (89, 99)  61/63 | 91  (86, 95)  12/140 |
|  |  |  |  |  |  |  |  |  | p=0.6627* | p=0.1120* | p=0.3883* | p=0.4118* |
| **Smear-positive** | 95  (88, 98)  91/96 | 100  (16, 100)  2/2 | 100  (96, 100)  91/91 | 29  (4, 62)  2/7 | 96  (87, 99)  50/52 | 100  (16, 100)  2/2 | 100  (93, 100)  50/50 | 50  (7, 88)  2/4 | 93  (81, 98)  41/44 | Non-calculable | 100  (91, 100)  41/41 | 0  (0, 58)  3/3 |
| **Smear-negative** | 70  (57, 78)  44/63 | 97  (94, 98)  215/222 | 86  (74, 93)  44/51 | 92  (88, 94)  215/234 | 71  (53, 82)  24/34 | 95  (88, 98)  88/93 | 83  (64, 92)  24/29 | 90  (82, 94)  10/98 | 69  (49, 81)  20/29 | Non-calculable | 91  (71, 98)  20/22 | 93  (88, 96)  9/136 |
|  |  |  |  |  |  |  |  |  | p=0.8888* |  | p=0.4022* | p=0.3217* |
| **Ultima all** | 88  (82, 92)  140/159 | 88  (84, 91)  199/225 | 84  (78, 88)  140/166 | 91  (87, 94)  199/218 | 85  (76, 90)  73/86 | 85  (77, 90)  81/95 | 84  (74, 89)  73/87 | 86  (78, 91)  13/94 | 92  (83, 96)  67/73 | 91  (84, 94)  118/130 | 85  (75, 90)  67/79 | 95  (90, 98)  6/124 |
|  |  |  |  |  |  |  |  |  | p=0.1815* | p=0.2020* | p=0.8731* | **p=0.0198*** |
|  | p=0.4122† | **p=0.0006†** | **p=0.0024†** | p=0.6584† | p=0.8287† | **p=0.0295†** | **p=0.0485†** | p=0.6650† | p=0.1309† | **p=0.0060†** | **p=0.0170†** | p=0.2298† |
| **Smear-positive** | 96  (90, 98)  92/96 | 100  (16, 100)  2/2 | 100  (96, 100)  92/92 | 33  (4, 69)  2/6 | 96  (87, 99)  50/52 | 100  (16, 100)  2/2 | 100  (93, 100)  50/50 | 50  (7, 88)  2/4 | 95  (85, 99)  42/44 | Non-calculable | 100  (92, 100)  42/42 | 0  (0, 73)  2/2 |
| **Smear-negative** | 76  (64, 84)  48/63 | 88  (83, 91)  196/222 | 65  (53, 73)  48/74 | 93  (89, 95)  196/211 | 68  (49, 79)  23/34 | 85  (76, 90)  79/93 | 62  (45, 74)  23/37 | 88  (79, 92)  11/90 | 86  (68, 94)  25/29 | 91  (84, 94)  117/129 | 68  (50, 79)  25/37 | 97  (92, 99)  4/121 |
|  |  |  |  |  |  |  |  |  | p=0.0847* | p=0.1886* | p=0.6263* | p=0.0127* |
|  | p=0.4221† | **p=0.0006†** | **p=0.0076†** | p=0.6886† | p=0.7930† | **p=0.0293†** | p=0.0666† | p=0.6608† | p=0.1154† | Non-calculable | **p=0.0416†** | p=0.2265† |

Within row p-values: *HIV-positive vs. HIV-negative.

Within column p-values for people of the same smear status: † MTB Plus vs. Ultima

Bold font represents p values <0.05.

**Supplementary table 4. Diagnostic accuracy and diagnostic yield of MTB Plus and Ultima compared to MRS for TB detection, stratified by HIV status. Initial and repeat results (if initially unsuccessful) are shown.** The specificity of MTB Plus has improved after repeat testing among PLHIV compared to data shown in **Table 2**. Data are % (95% CI) n/N

|  | **All participants**  n=498 | | | | **HIV-negative**  229/498 (46%) | | | | **HIV-positive**  269/498 (54%) | | | |
| --- | --- | --- | --- | --- | --- | --- | --- | --- | --- | --- | --- | --- |
|  | **Sensitivity** | **Specificity** | **DYT** | **DYD** | **Sensitivity** | **Specificity** | **DYT** | **DYD** | **Sensitivity** | **Specificity** | **DYT** | **DYD** |
| **MTB Plus** | 86  (79, 89)  148/173 | 96  (93, 97)  279/291 | 32  (28, 35)  160/498 | 38  (31, 39)  160/416 | 87  (78, 91)  77/89 | 93  (87, 96)  118/127 | 17  (14, 20)  86/498 | 21  (17, 24)  86/416 | 85  (75, 90)  71/84 | 98  (95, 99)  161/164 | 15  (12, 17)  74/498 | 18  (14, 21)  74/416 |
|  |  |  |  |  |  |  |  |  | p=0.7094* | **p=0.0253*** | p=0.3004***** | **p=0.2912*** |
| **Smear-positive** | 95  (89, 98)  99/104 | 80  (28, 98)  4/5 | 20  (17, 23)  100/498 | 14  (11, 17)  60/416 | 96  (87, 99)  52/54 | 75  (19, 98)  3/4 | 11  (8, 13)  53/498 | 13  (10, 15)  53/416 | 94  (83, 98)  47/50 | 100  (3, 100)  1/1 | 9  (7, 12)  47/498 | 11  (8, 14)  47/416 |
| **Smear-negative** | 71  (59, 79)  49/69 | 96  (93, 98)  274/285 | 12  (9, 14)  60/498 | 24  (20, 27)  100/416 | 71  (54, 82)  25/35 | 93  (88, 96)  115/123 | 7  (5, 8)  33/498 | 8  (6, 10)  33/416 | 71  (53, 82)  24/34 | 98  (95, 99)  159/162 | 5  (4, 7)  27/498 | 6  (4, 9)  27/416 |
|  |  |  |  |  |  |  |  |  | p=0.9387* | **p=0.0434*** | p=0.4243* | p=0.4213* |
| **Ultima** | 90  (85, 93)  154/171 | 85  (80, 88)  260/306 | 40  (36, 43)  200/498 | 48  (69, 76)  200/416 | 88  (79, 92)  77/88 | 83  (76, 88)  110/132 | 20  (16, 23)  99/498 | 48  (69, 76)  200/416 | 93  (85, 96)  77/83 | 86  (80, 90)  147/171 | 20  (17, 23)  101/498 | 24  (20, 28)  101/416 |
|  |  |  |  |  |  |  |  |  | p=0.2496* | p=0.5268* | p=0.8743* | **p<0.0001*** |
|  | p=0.2015† | **p<0.0001**† | **p=0.0083†** | **p=0.0051†** | p=0.8458† | **p=0.0176†** | **p=**0.2895 | **p<0.0001**† | p=0.0933† | **p<0.0001**† | **p=0.0246†** | **p=0.0216†** |
| **Smear-positive** | 97  (92, 99)  100/103 | 71  (29, 93)  5/7 | 20  (17, 23)  102/498 | 24  (20, 27)  98/416 | 98  (90, 100)  53/54 | 80  (28, 98)  4/5 | 11  (8, 13)  54/498 | 13  (10, 16)  54/416 | 96  (86, 99)  47/49 | 50  (1, 96)  1/2 | 10  (7, 12)  48/498 | 12  (9, 14)  48/416 |
| **Smear-negative** | 79  (68, 86)  54/68 | 85  (80, 88)  251/295 | 20  (16, 22)  98/498 | 25  (20, 28)  102/416 | 71  (53, 82)  24/34 | 83  (76, 88)  106/127 | 9  (7, 11)  45/498 | 11  (8, 13)  45/416 | 88  (73, 95)  30/34 | 86  (80, 90)  145/168 | 11  (8, 13)  53/498 | 13  (10, 15)  53/416 |
|  |  |  |  |  |  |  |  |  | p=0.0719* | p=0.4970* | p=0.3947* | p=0.3896* |
|  | p=0.2553† | **p<0.0001**† | **p=0.0010†** | p=0.8715**†** | p=0.9387† | **p=0.0133†** | p=0.1570 | p=0.1535 | p=0.0719† | **p<0.0001**† | **p=0.0024†** | **p=0.0022†** |

Within row p-values: *HIV-positive vs. HIV-negative.

Within column p-values: †MTB Plus vs. Ultima.

Abbreviations: DYD, diagnostic yield among those diagnosed; DYT, diagnostic yield among those tested; NPV, negative predictive value; PPV, positive predictive value. Bold font represents p values <0.05.

## **Supplementary table 5. Proportion of successful and unsuccessful MTB-RIF Dx results, stratified by MTB Plus- or Ultima-positivity, and compared to Ultra for rifampicin resistance detection. Results were further stratified by on eluate was tested on the same day or not.** MTB-RIF Dx had more unsuccessful results compared to Ultra. Unsuccessful results were more frequentinMTB Plus than Ultima-positive eluates. MTB-RIF Dx done the same day had a lower proportion of unsuccessful results compared to when eluate was tested later. Data are % (95% CI) n/N

|  | **Successful** | **Unsuccessful** | | |
| --- | --- | --- | --- | --- |
| **All** | **Indeterminate** | **Error** |
| Ultra (All) | 88  (84, 90)  316/360 | 12*  (9, 15)  44/360 | 95  (85, 99)  42/44 | 5  (1, 12)  2/44 |
| **MTB Plus positives (n=120)** | | | | |
| MTB-RIF Dx results | 81  (74, 86)  120/148 | 19  (13, 24)  28/148 | 96  (82, 100)  27/28 | 4  (0, 14)  1/28 |
| Done same day | 91  (81, 96)  60/66 | 9  (3, 16)  6/66  p=0.4675‡ | 100  (54, 100)  6/6 | 0 |
| Not done same day | 73  (62, 80)  60/82 | 27  (18, 35)  22/82 | 95  (77, 100)  21/22 | 5  (0, 18)  1/22 |
|  |  | **p=0.0062**† |  |  |
| **Ultima-positives (n=126)** | | | | |
| MTB-RIF Dx results | 66  (59, 71)  126/191 | 34  (27, 39)  65/191 | 98  (92, 100)  64/65 | 2  (0, 6)  1/65 |
| Done same day | 82  (71, 88)  62/76 | 18  (10, 26)  14/76  p= 0.1482‡ | 100  (77, 100)  14/14 | 0 |
| Not done same day | 56  (46, 63)  64/115 | 44  (35, 51)  51/115 | 98  (90, 100)  50/51 | 2  (0, 8)  1/51 |
|  |  | **p=0.0002**† |  |  |

*40/44 Ultra unsuccessful results were trace, the remaining 4 were low.

Within column p-values: ‡compared with Ultra, †MTB-RIF Dx done same day vs later day for MTB Plus-positive or Ultima-positive eluates.

Abbreviations: RIF, Rifampicin.

Bold font represents p values <0.05.

**Supplementary table 6.** **Proportion of MTB-RIF Dx unsuccessful results stratified by MTB Plus and Ultima Semi-quantitation levels.** Unsuccessful results were common among samples detected under the very low category by either MTB Plus or Ultima regardless of the day MTB-RIF Dx testing was done. Data are % (95% CI) n/N

|  | **Overall MTB-RIF Dx validity, n=160** | | **MTB-RIF Dx validity (MTB-DIF Dx run same day sample processed), n=71** | | **MTB-RIF Dx validity (MTB DIF Dx run later day sample processed), n=89** | |
| --- | --- | --- | --- | --- | --- | --- |
| **MTB Plus semiquantitative level** | **Unsuccessful** | **Successful** | **Unsuccessful** | **Successful** | **Unsuccessful** | **Successful** |
| High | 3  (0, 10)  1/30 | 36  (28, 44)  47/130 | 0 | 35  (24, 47)  23/65 | 4  (4, 12)  1/24 | 37  (25, 49)  24/65 |
| Medium | 10  0, 21  (3/30) | 38  (29, 46)  49/130 | 0 | 37  (25, 49)  24/65 | 13  (1, 26)  3/24 | 39  (27, 50)  25/65 |
| Low | 13  (1, 26)  4/30 | 22  (15, 29)  28/130 | 17  (0, 46)  1/6 | 23  (13, 33)  15/65 | 13  (1, 26)  3/24 | 20  (10, 30)  13/65 |
| Very Low | 73  (58, 89)  22/30 | 4  (1, 8)  6/130 | 83  (53, 100)  5/6 | 5  (0, 10)  3/65 | 70  (53, 89)  17/24 | 5  (5, 10)  3/65 |
|  | **p<0.0001** |  | **p=0.0209** |  | **p<0.0001** |  |
| **Ultima semiquantitative level** |  |  |  |  |  |  |
| High | 1  (0, 4)  1/69 | 46  (37, 54)  60/131 | 0 | 42  (30, 54)  27/64 | 2  (1, 5)  1/54 | 49  (37, 61)  33/67 |
| Medium | 3  (0, 7)  2/69 | 36  (28, 44)  47/131 | 0 | 42  (30, 54)  27/64 | 4  (1, 9)  2/54 | 30  (19, 41)  20/67 |
| Low | 20  (11, 30)  14/69 | 17  (10, 23)  22/131 | 20  (0, 40)  3/15 | 13  (5, 20)  8/64 | 20  (10, 31)  11/54 | 21  (11, 31)  14/67 |
| Very Low | 75  (65, 86)  52/69 | 1  (0, 4)  2/131 | 80  (60, 100)  12/15 | 3  (0, 7)  2/64 | 74  (62, 86)  40/54 | 0 |
|  | **p<0.0001** |  | **p=0.0010** |  | **p<0.0001** |  |

Within column p-values compare unsuccessful MTB-RIF Dx results across semiquantitative levelfor a specific test. Bold font represents p values <0.05.

**Supplementary table 7**. **Diagnostic accuracy of MTB-RIF Dx compared to Ultra for the detection of rifampicin resistance in sputum samples.** MTB-RIF Dx performed similarly to Ultra. Data are % (95% CI) n/N

|  | **All participants, n=261** | | | |
| --- | --- | --- | --- | --- |
|  | **Sensitivity** | **Specificity** | **PPV** | **NPV** |
| **Ultra** | 100  (40, 100)  4/4 | 97  (92, 99)  145/150 | 44  (14, 72)  4/9 | 100  (97, 100)  145/145 |
| **MTB-RIF Dx** | 100  (40, 100)  4/4 | 99  (96, 100)  125/126 | 80  (28, 98)  4/5 | 100  (97, 100)  125/125 |
|  | p>0.9999 | p=0.1495 | p=0.1977 | p>0.9999 |

Within column p-values,Ultra vs. MTB-RIF Dx.

Abbreviations: NPV, negative predictive value; PPV, positive predictive value. Bold font represents p values <0.05.

**Supplementary table 8**. **Specificity and positive predictive values of MTB Plus and Ultima compared to MRS and eMRS for TB detection stratified by previous TB status. Initial and repeat results (if initially unsuccessful) are shown.** The specificity of both assays was not affected by previous TB status regardless for reference standard used. Data are % (95% CI) n/N

|  | **MRS** | | | | **eMRS** | | | |
| --- | --- | --- | --- | --- | --- | --- | --- | --- |
|  | **No previous TB**  288/498 (58%) | | **Previous TB**  210/498 (42%) | | **No previous TB**  288/498 (58%) | | **Previous TB**  210/498 (42%) | |
|  | **Specificity** | **PPV** | **Specificity** | **PPV** | **Specificity** | **PPV** | **Specificity** | **PPV** |
| **MTB Plus** | 95  (91, 97)  158/166 | 92  (85, 95)  90/98 | 97  (92, 99)  121/125 | 94  (84, 97)  58/62 | 96  (92, 98)  156/162 | 94  (87, 97)  92/98 | 98  (94, 100)  115/117 | 97  (89, 99)  60/62 |
|  |  |  | p=0.4917¶ | p=0.6888¶ |  |  | p=0.3246¶ | p=0.4128¶ |
|  |  |  |  |  | p=0.6173**†** | p=0.5791**†** | p=0.4561**†** | p=0.4026**†** |
| **Ultima** | 84  (77, 88)  142/170 | 76  (68, 82)  91/119 | 86  (79, 91)  115/133 | 78  (67, 84)  63/81 | 85  (79, 89)  140/164 | 80  (71, 85)  95/119 | 88  (81, 92)  108/123 | 81  (71, 88)  66/81 |
|  |  |  | p=0.4796¶ | p=0.8293¶ |  |  | p=0.5507¶ | p=0.7726¶ |
|  |  |  |  |  | p=0.6435† | p=0.5304† | p=0.7495† | p=0.5584† |

Within row p-values: ¶No previous TB vs. Previous TB; **†**MRSvs. eMRS.

Abbreviations: PPV, positive predictive value.

Bold font represents p values <0.05.

|  | **Section & Topic** | **No** | **Item** | | **Reported** |
| --- | --- | --- | --- | --- | --- |
|  | | | |  | |
|  | **TITLE OR ABSTRACT** |  |  | |  |
|  | **1** | Identification as a study of diagnostic accuracy using at least one measure of accuracy  (such as sensitivity, specificity, predictive values, or AUC) | | Yes |
| **ABSTRACT** |  |  | |  |
|  | **2** | Structured summary of study design, methods, results, and conclusions  (for specific guidance, see STARD for Abstracts) | | Yes |
| **INTRODUCTION** |  |  | |  |
|  | **3** | Scientific and clinical background, including the intended use and clinical role of the index test | | Yes |
|  | **4** | Study objectives and hypotheses | |  |
| **METHODS** |  |  | |  |
| *Study design* | **5** | Whether data collection was planned before the index test and reference standard  were performed (prospective study) or after (retrospective study) | | Yes |
| *Participants* | **6** | Eligibility criteria | | Yes |
|  | **7** | On what basis potentially eligible participants were identified  (such as symptoms, results from previous tests, inclusion in registry) | | Yes |
|  | **8** | Where and when potentially eligible participants were identified (setting, location and dates) | | Yes |
|  | **9** | Whether participants formed a consecutive, random or convenience series | | Yes |
| *Test methods* | **10a** | Index test, in sufficient detail to allow replication | | Yes |
|  | **10b** | Reference standard, in sufficient detail to allow replication | | Yes |
|  | **11** | Rationale for choosing the reference standard (if alternatives exist) | | NA |
|  | **12a** | Definition of and rationale for test positivity cut-offs or result categories  of the index test, distinguishing pre-specified from exploratory | | NA |
|  | **12b** | Definition of and rationale for test positivity cut-offs or result categories  of the reference standard, distinguishing pre-specified from exploratory | | Yes |
|  | **13a** | Whether clinical information and reference standard results were available  to the performers/readers of the index test | | Yes |
|  | **13b** | Whether clinical information and index test results were available  to the assessors of the reference standard | | Yes |
| *Analysis* | **14** | Methods for estimating or comparing measures of diagnostic accuracy | | Yes |
|  | **15** | How indeterminate index test or reference standard results were handled | | Yes |
|  | **16** | How missing data on the index test and reference standard were handled | | Yes |
|  | **17** | Any analyses of variability in diagnostic accuracy, distinguishing pre-specified from exploratory | | Yes |
|  | **18** | Intended sample size and how it was determined | | No |
| **RESULTS** |  |  | |  |
| *Participants* | **19** | Flow of participants, using a diagram | | Yes |
|  | **20** | Baseline demographic and clinical characteristics of participants | | Yes |
|  | **21a** | Distribution of severity of disease in those with the target condition | | Yes |
|  | **21b** | Distribution of alternative diagnoses in those without the target condition | | No |
|  | **22** | Time interval and any clinical interventions between index test and reference standard | | Yes |
| *Test results* | **23** | Cross tabulation of the index test results (or their distribution)  by the results of the reference standard | | Yes |
|  | **24** | Estimates of diagnostic accuracy and their precision (such as 95% confidence intervals) | | Yes |
|  | **25** | Any adverse events from performing the index test or the reference standard | | No |
| **DISCUSSION** |  |  | |  |
|  | **26** | Study limitations, including sources of potential bias, statistical uncertainty, and generalizability | | Yes |
|  | **27** | Implications for practice, including the intended use and clinical role of the index test | | Yes |
|  | **OTHER INFORMATION** |  |  | |  |
|  |  | **28** | Registration number and name of registry | | Not a clinical trial |
|  |  | **29** | Where the full study protocol can be accessed | | No |
|  |  | **30** | Sources of funding and other support; role of funders | | Yes |

**References**

1. World Health Organization. Definitions and reporting framework for tuberculosis–2013 revision. World Health Organization.

2. Rudolf F, Lemvik G, Abate E, Verkuilen J, Schön T, Gomes VF, et al. TBscore II: refining and validating a simple clinical score for treatment monitoring of patients with pulmonary tuberculosis. Scandinavian journal of infectious diseases. 2013;45(11):825-36.
